# Supplementary material for: Association of Sugar-Sweetened Beverage Consumption and Moderate-to-Vigorous Physical Activity with Childhood and Adolescent Overweight/Obesity: Findings from a Surveillance Project in Jiangsu Province of China
Source: MDPI journal article supplement (doi:10.3390/nu15194164), 2023-09-27

## **Supplementary Material**

**Supplementary Figure S1.** Proportion of children and adolescents with overweight/obesity in association with their SSB and MVPA characteristics by age and gender during 2021-2022 academic year

**Supplementary Table S1.** Characteristics of 119467 participants according to SSB consumption in Jiangsu Province, China

**Supplementary Table S2.** Characteristics of 119467 participants according to inadequate MVPA in Jiangsu Province, China

**Supplementary Table S3.** Characteristics of 119467 participants according to SSB-MVPA categories in Jiangsu Province, China

**Supplementary Table S4.** The association of the SSB consumption habit with overweight/obesity in total sample and by age/gender subgroups

**Supplementary Table S5.** The association of the MVPA level with overweight/obesity in total sample and by age/gender subgroups

**Supplementary Table S6.** The separate association of SSB consumption or inadequate MVPA with BMI in total sample and by age/gender subgroups

**Supplementary Table S7.** The joint association of SSB and MVPA with BMI among 119467 children and adolescents in Jiangsu Province, China

**Supplementary Figure S2.** Joint association of SSB and MVPA with BMI, stratified by age or gender

**Supplementary Figure S1.** Proportion of children and adolescents with overweight/obesity in association with their SSB and MVPA characteristics by age and gender during 2021-2022 academic year

(a)

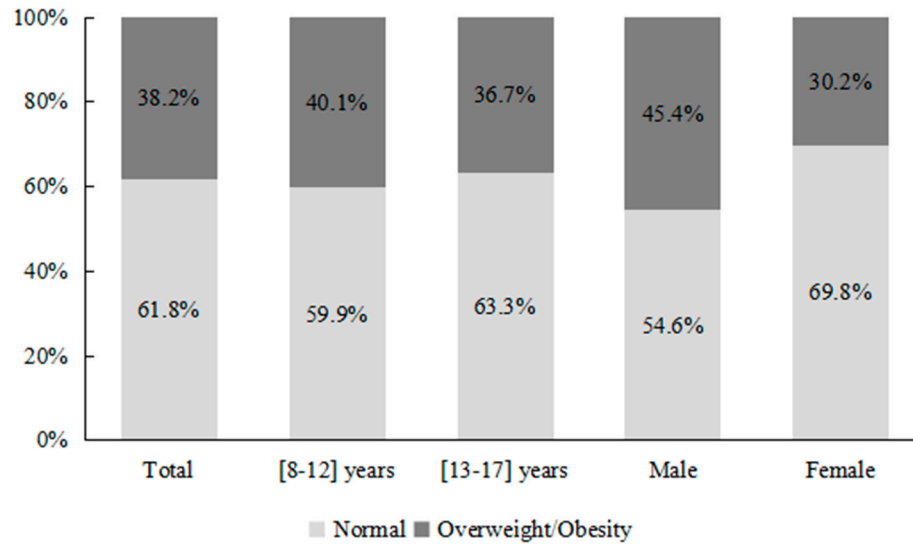

(b)

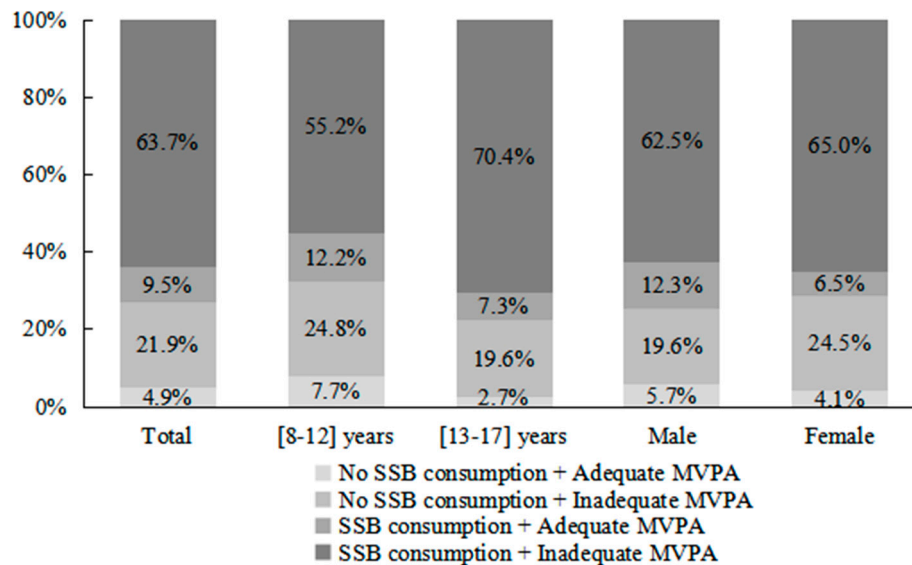

Note: the upper figure (a) shows the proportion of participants with and without overweight/obesity, in total sample and by age/gender subgroups; the lower figure (b) shows the proportion of participants across joint classifications of SSB and MVPA, in total sample and by age/gender subgroups.

**Supplementary Table S1.** Characteristics of 119,467 participants according to SSB consumption in Jiangsu Province, China

| Variables                    | No SSB consumption | SSB consumption | p-value <sup>a</sup> |
|------------------------------|--------------------|-----------------|----------------------|
|                              | (32,041)           | (87,426)        |                      |
| N(%)                         |                    |                 |                      |
| Age group,year               |                    |                 |                      |
| [8-12]                       | 17,232(32.52)      | 35,764(67.48)   | <0.001***            |
| [13-17]                      | 14,809(22.28)      | 51,662(77.72)   |                      |
| Gender                       |                    |                 |                      |
| Male                         | 15,837(25.23)      | 46,922(74.77)   | <0.001***            |
| Female                       | 16,204(28.57)      | 40,504(71.43)   |                      |
| Residence                    |                    |                 |                      |
| Urban                        | 17,265(25.33)      | 50,903(74.67)   | <0.001***            |
| Rural                        | 14,776(28.80)      | 36,523(71.20)   |                      |
| Region of Jiangsu Province   |                    |                 |                      |
| Southern                     | 13,000(25.55)      | 37,887(74.45)   | <0.001***            |
| Central                      | 4,894(28.25)       | 12,431(71.75)   |                      |
| Northern                     | 14,147(27.60)      | 37,108(72.40)   |                      |
| Family types                 |                    |                 |                      |
| Core families                | 14,262(27.08)      | 38,410(72.92)   | 0.075                |
| Others <sup>b</sup>          | 17,779(26.62)      | 49,016(73.38)   |                      |
| Maternal education           |                    |                 |                      |
| Primary or illiterate        | 3,326(23.75)       | 10,678(76.25)   | <0.001***            |
| Junior or senior high school | 19,828(25.70)      | 57,330(74.30)   |                      |
| College                      | 7,747(30.85)       | 17,368(69.15)   |                      |
| Post-graduate and beyond     | 1,140(35.74)       | 2,050(64.26)    |                      |
| Paternal education           |                    |                 |                      |
| Primary or illiterate        | 1,930(24.88)       | 5,826(75.12)    | <0.001***            |
| Junior or senior high school | 20,430(25.30)      | 60,308(74.70)   |                      |
| College                      | 8,402(30.75)       | 18,921(69.25)   |                      |
| Post-graduate and beyond     | 1,279(35.04)       | 2,371(64.96)    |                      |

<sup>a</sup> p-values were calculated from chi-square tests.

<sup>b</sup> Including extended families, one-parent families, re-married families, and inter-generational families.

\*p<0.05, \*\*p<0.01, \*\*\*p<0.001.

**Supplementary Table S2.** Characteristics of 119,467 participants according to inadequate MVPA in Jiangsu Province, China

| Variables                    | Adequate MVPA<br>(17,237) | Inadequate MVPA<br>(102,230) | p-value <sup>a</sup> |
|------------------------------|---------------------------|------------------------------|----------------------|
|                              | N(%)                      |                              |                      |
| Age group,year               |                           |                              |                      |
| [8-12]                       | 10,589(19.98)             | 42,407(80.02)                | <0.001***            |
| [13-17]                      | 6,648(10.00)              | 59,823(90.00)                |                      |
| Gender                       |                           |                              |                      |
| Male                         | 11,245(17.92)             | 51,514(82.08)                | <0.001***            |
| Female                       | 5,992(10.57)              | 50,716(89.43)                |                      |
| Residence                    |                           |                              |                      |
| Urban                        | 9,268(13.60)              | 58,900(86.40)                | <0.001***            |
| Rural                        | 7,969(15.53)              | 43,330(84.47)                |                      |
| Region of Jiangsu Province   |                           |                              |                      |
| Southern                     | 7,373(14.49)              | 43,514(85.51)                | 0.635                |
| Central                      | 2,524(14.57)              | 14,801(85.43)                |                      |
| Northern                     | 7,340(14.32)              | 43,915(85.68)                |                      |
| Family types                 |                           |                              |                      |
| Core families                | 7,176(13.62)              | 45,496(86.38)                | <0.001***            |
| Others <sup>b</sup>          | 10,061(15.06)             | 56,734(84.94)                |                      |
| Maternal education           |                           |                              |                      |
| Primary or illiterate        | 1,595(11.39)              | 12,409(88.61)                | <0.001***            |
| Junior or senior high school | 10,204(13.22)             | 66,954(86.78)                |                      |
| College                      | 4,438(17.67)              | 20,677(82.33)                |                      |
| Post-graduate and beyond     | 1,000(31.35)              | 2,190(68.65)                 |                      |
| Paternal education           |                           |                              |                      |
| Primary or illiterate        | 928(11.96)                | 6,828(88.04)                 | <0.001***            |
| Junior or senior high school | 10,639(13.18)             | 70,099(86.82)                |                      |
| College                      | 4,593(16.81)              | 22,730(83.19)                |                      |
| Post-graduate and beyond     | 1,077(29.51)              | 2,573(70.49)                 |                      |

<sup>a</sup> p-values were calculated from chi-square tests.

<sup>b</sup> Including extended families, one-parent families, re-married families, and inter-generational families.

\* p<0.05, \*\* p<0.01, \*\*\* p<0.001.

**Supplementary Table S3.** Characteristics of 119,467 participants according to SSB-MVPA categories in Jiangsu Province, China

| Variables                    | No SSB consumption<br>+Adequate MVPA<br>(5,877) | No SSB consumption<br>+Inadequate MVPA<br>(26,164) | SSB consumption+<br>Adequate MVPA<br>(11,360) | SSB consumption+<br>Inadequate MVPA<br>(76,066) | p-value <sup>a</sup> |
|------------------------------|-------------------------------------------------|----------------------------------------------------|-----------------------------------------------|-------------------------------------------------|----------------------|
| N(%)                         |                                                 |                                                    |                                               |                                                 |                      |
| Age group,year               |                                                 |                                                    |                                               |                                                 |                      |
| [8-12]                       | 4,100(7.74)                                     | 13,132(24.78)                                      | 6,489(12.24)                                  | 29,275(55.24)                                   | <0.001***            |
| [13-17]                      | 1,777(2.67)                                     | 13,032(19.61)                                      | 4,871(7.33)                                   | 46,791(70.39)                                   |                      |
| Gender                       |                                                 |                                                    |                                               |                                                 |                      |
| Male                         | 3,546(5.65)                                     | 12,291(19.58)                                      | 7,699(12.27)                                  | 39,223(62.50)                                   | <0.001***            |
| Female                       | 2,331(4.11)                                     | 13,873(24.46)                                      | 3,661(6.46)                                   | 36,843(64.97)                                   |                      |
| Residence                    |                                                 |                                                    |                                               |                                                 |                      |
| Urban                        | 3,012(4.42)                                     | 14,253(20.91)                                      | 6,256(9.18)                                   | 44,647(65.50)                                   | <0.001***            |
| Rural                        | 2,865(5.58)                                     | 11,911(23.22)                                      | 5,104(9.95)                                   | 31,419(61.25)                                   |                      |
| Region of Jiangsu Province   |                                                 |                                                    |                                               |                                                 |                      |
| Southern                     | 2,407(4.73)                                     | 10,593(20.82)                                      | 4,966(9.76)                                   | 32,921(64.69)                                   | <0.001***            |
| Central                      | 1,002(5.78)                                     | 3,892(22.46)                                       | 1,522(8.78)                                   | 10,909(62.97)                                   |                      |
| Northern                     | 2,468(4.82)                                     | 11,679(22.79)                                      | 4,872(9.51)                                   | 32,236(62.89)                                   |                      |
| Family types                 |                                                 |                                                    |                                               |                                                 |                      |
| Core families                | 2,461(4.67)                                     | 11,801(22.40)                                      | 4,715(8.95)                                   | 33,695(63.97)                                   | <0.001***            |
| Others <sup>b</sup>          | 3,416(5.11)                                     | 14,363(21.50)                                      | 6,645(9.95)                                   | 42,371(63.43)                                   |                      |
| Maternal education           |                                                 |                                                    |                                               |                                                 |                      |
| Primary or illiterate        | 444(3.17)                                       | 2,882(20.58)                                       | 1,151(8.22)                                   | 9,527(68.03)                                    | <0.001***            |
| Junior or senior high school | 3,249(4.21)                                     | 16,579(21.49)                                      | 6,955(9.01)                                   | 50,375(65.29)                                   |                      |

|                              |             |               |              |               |           |
|------------------------------|-------------|---------------|--------------|---------------|-----------|
| College                      | 1,727(6.88) | 6,020(23.97)  | 2,711(10.79) | 14,657(58.36) |           |
| Post-graduate and beyond     | 457(14.33)  | 683(21.41)    | 543(17.02)   | 1,507(47.24)  |           |
| Paternal education           |             |               |              |               |           |
| Primary or illiterate        | 273(3.52)   | 1,657(21.36)  | 655(8.45)    | 5,171(66.67)  | <0.001*** |
| Junior or senior high school | 3,336(4.13) | 17,094(21.17) | 7,303(9.05)  | 53,005(65.65) |           |
| College                      | 1,780(6.51) | 6,622(24.24)  | 2,813(10.30) | 16,108(58.95) |           |
| Post-graduate and beyond     | 488(13.37)  | 791(21.67)    | 589(16.14)   | 1,782(48.82)  |           |

<sup>a</sup> p-values were calculated from chi-square tests.

<sup>b</sup> Including extended families, one-parent families, re-married families, and inter-generational families.

\*p<0.05, \*\*p<0.01, \*\*\*p<0.001.

**Supplementary Table S4.** The association of the SSB consumption habit with overweight/obesity in total sample and by age/gender subgroups

| SSB Consumption                                                |           | Total               | By Age Group          |                        |                                   | By Gender           |                       |                                   |
|----------------------------------------------------------------|-----------|---------------------|-----------------------|------------------------|-----------------------------------|---------------------|-----------------------|-----------------------------------|
|                                                                |           | OR (95% CI)         | [8-12]<br>OR (95% CI) | [13-17]<br>OR (95% CI) | P for<br>interaction <sup>d</sup> | Male<br>OR (95% CI) | Female<br>OR (95% CI) | P for<br>interaction <sup>d</sup> |
| SSB consumption (three categories, reference group is “never”) |           |                     |                       |                        |                                   |                     |                       |                                   |
| Model 1 <sup>a</sup>                                           | sometimes | 1.05 (1.02,1.08)**  | 1.02 (0.99,1.06)      | 1.07 (1.03,1.11)**     | 0.035*                            | 1.01 (0.98,1.05)    | 1.09 (1.05,1.13)***   | 0.001**                           |
|                                                                | always    | 1.02 (0.97,1.07)    | 1.06 (0.97,1.15)      | 1.01 (0.94,1.07)       |                                   | 0.99 (0.93,1.05)    | 1.05 (0.97,1.14)      |                                   |
| Model 2 <sup>b</sup>                                           | sometimes | 1.05 (1.02,1.08)**  | 1.02 (0.99,1.06)      | 1.07 (1.03,1.11)**     | 0.037*                            | 1.01 (0.98,1.05)    | 1.09 (1.05,1.14)***   | 0.001**                           |
|                                                                | always    | 1.02 (0.97,1.07)    | 1.06 (0.98,1.15)      | 1.01 (0.95,1.07)       |                                   | 0.99 (0.93,1.06)    | 1.05 (0.97,1.14)      |                                   |
| Model 3 <sup>c</sup>                                           | sometimes | 1.05 (1.02,1.08)*** | 1.02 (0.99,1.06)      | 1.07 (1.03,1.11)**     | 0.036*                            | 1.02 (0.98,1.05)    | 1.09 (1.05,1.14)***   | 0.001**                           |
|                                                                | always    | 1.01 (0.96,1.06)    | 1.06 (0.97,1.15)      | 1.00 (0.94,1.07)       |                                   | 0.99 (0.93,1.05)    | 1.05 (0.97,1.14)      |                                   |

<sup>a</sup> Model 1 adjusted for age and gender.

<sup>b</sup> Model 2 adjusted for age, gender, residence, regions, family types, paternal education, and maternal education.

<sup>c</sup> Model 3 adjusted for age, gender, residence, regions, family types, paternal education, maternal education, and MVPA.

<sup>d</sup> P for interaction was calculated using the likelihood ratio test by comparing the two models with and without the interactive term.

\*p<0.05, \*\*p<0.01, \*\*\*p<0.001; Abbreviations: OR, odds ratio; CI, confidence interval.

**Supplementary Table S5.** The association of the MVPA level with overweight/obesity in total sample and by age/gender subgroups

|                                                               |                    | Total                           | By Age Group                    |                                 |                                   | By Gender                       |                       |                                   |
|---------------------------------------------------------------|--------------------|---------------------------------|---------------------------------|---------------------------------|-----------------------------------|---------------------------------|-----------------------|-----------------------------------|
| MVPA                                                          |                    | OR (95% CI)                     | [8-12]<br>OR (95% CI)           | [13-17]<br>OR (95% CI)          | P for<br>interaction <sup>d</sup> | Male<br>OR (95% CI)             | Female<br>OR (95% CI) | P for<br>interaction <sup>d</sup> |
| MVPA (three categories, reference group is “high frequency ”) |                    |                                 |                                 |                                 |                                   |                                 |                       |                                   |
| Model 1 <sup>a</sup>                                          | moderate frequency | 1.10 (1.06,1.13) <sup>***</sup> | 1.12 (1.07,1.17) <sup>***</sup> | 1.07 (1.02,1.13) <sup>**</sup>  | 0.472                             | 1.14 (1.09,1.19) <sup>***</sup> | 1.02 (0.97,1.08)      | 0.079                             |
|                                                               | low frequency      | 1.09 (1.05,1.13) <sup>***</sup> | 1.09 (1.04,1.14) <sup>***</sup> | 1.08 (1.02,1.13) <sup>**</sup>  |                                   | 1.15 (1.10,1.20) <sup>***</sup> | 0.99 (0.94,1.05)      |                                   |
| Model 2 <sup>b</sup>                                          | moderate frequency | 1.10 (1.06,1.13) <sup>***</sup> | 1.12 (1.07,1.17) <sup>***</sup> | 1.07 (1.02,1.13) <sup>**</sup>  | 0.544                             | 1.14 (1.09,1.19) <sup>***</sup> | 1.03 (0.97,1.09)      | 0.091                             |
|                                                               | low frequency      | 1.09 (1.05,1.12) <sup>***</sup> | 1.09 (1.04,1.14) <sup>***</sup> | 1.07 (1.02,1.13) <sup>**</sup>  |                                   | 1.15 (1.10,1.20) <sup>***</sup> | 0.98 (0.92,1.03)      |                                   |
| Model 3 <sup>c</sup>                                          | moderate frequency | 1.09 (1.06,1.13) <sup>***</sup> | 1.12 (1.07,1.17) <sup>***</sup> | 1.07 (1.01,1.13) <sup>*</sup>   | 0.538                             | 1.14 (1.09,1.19) <sup>***</sup> | 1.02 (0.96,1.08)      | 0.084                             |
|                                                               | low frequency      | 1.08 (1.05,1.12) <sup>***</sup> | 1.08 (1.03,1.14) <sup>***</sup> | 1.07 (1.02,1.13) <sup>***</sup> |                                   | 1.15 (1.10,1.20) <sup>***</sup> | 0.97 (0.92,1.03)      |                                   |

<sup>a</sup> Model 1 adjusted for age and gender.

<sup>b</sup> Model 2 adjusted for age, gender, residence, regions, family types, paternal education, and maternal education.

<sup>c</sup> Model 3 adjusted for age, gender, residence, regions, family types, paternal education, maternal education, and SSB.

<sup>d</sup> P for interaction was calculated using the likelihood ratio test by comparing the two models with and without the interactive term.

\*p<0.05, \*\*p<0.01, \*\*\*p<0.001; Abbreviations: OR, odds ratio; CI, confidence interval.



**Supplementary Table S6.** The separate association of SSB consumption or inadequate MVPA with BMI in total sample and by age/gender subgroups

| Variables                    | Total               | By Age Group               |                             |                                   | By Gender                |                            |                                |
|------------------------------|---------------------|----------------------------|-----------------------------|-----------------------------------|--------------------------|----------------------------|--------------------------------|
|                              | $\beta$ (95% CI)    | [8-12]<br>$\beta$ (95% CI) | [13-17]<br>$\beta$ (95% CI) | P for<br>interaction <sup>d</sup> | Male<br>$\beta$ (95% CI) | Female<br>$\beta$ (95% CI) | P for interaction <sup>d</sup> |
| SSB Consumption (yes vs. no) |                     |                            |                             |                                   |                          |                            |                                |
| Model 1 <sup>a</sup>         | 0.22 (0.17,0.27)*** | 0.17 (0.10,0.25)***        | 0.26 (0.18,0.34)***         | 0.242                             | 0.15 (0.07,0.23)***      | 0.29 (0.22,0.36)***        | <0.001***                      |
| Model 2 <sup>b</sup>         | 0.21 (0.15,0.26)*** | 0.15 (0.08,0.23)***        | 0.25 (0.17,0.33)***         | 0.220                             | 0.14 (0.06,0.22)***      | 0.27 (0.20,0.34)***        | <0.001***                      |
| Model 3 <sup>c</sup>         | 0.21 (0.15,0.26)*** | 0.16 (0.08,0.23)***        | 0.25 (0.17,0.33)***         | 0.208                             | 0.14 (0.06,0.22)***      | 0.27 (0.20,0.34)***        | <0.001***                      |
| Inadequate MVPA (yes vs. no) |                     |                            |                             |                                   |                          |                            |                                |
| Model 1 <sup>a</sup>         | 0.37 (0.30,0.44)*** | 0.19 (0.07,0.31)**         | 0.43 (0.34,0.51)***         | 0.001**                           | 0.46 (0.35,0.57)***      | 0.26 (0.17,0.35)***        | 0.125                          |
| Model 2 <sup>b</sup>         | 0.34 (0.28,0.42)*** | 0.16 (0.04,0.28)**         | 0.40 (0.32,0.49)***         | 0.001**                           | 0.45 (0.34,0.56)***      | 0.23 (0.14,0.31)***        | 0.125                          |
| Model 3 <sup>c</sup>         | 0.35 (0.28,0.42)*** | 0.16 (0.04,0.28)**         | 0.41 (0.32,0.49)***         | 0.001**                           | 0.45 (0.34,0.56)***      | 0.23 (0.14,0.32)***        | 0.115                          |

<sup>a</sup> Model 1 adjusted for age and gender.

<sup>b</sup> Model 2 adjusted for age, gender, residence, regions, family types, paternal education, and maternal education.

<sup>c</sup> Model 3 adjusted for age, gender, residence, regions, family types, paternal education, maternal education, and SSB (when the main independent variable of interest was MVPA) or MVPA (when the main independent variable of interest was SSB).

<sup>d</sup> P for interaction was calculated using the likelihood ratio test by comparing the two models with and without the interactive term.

\*p<0.05, \*\*p<0.01, \*\*\*p<0.001; Abbreviations: CI, confidence interval.

**Supplementary Table S7.** The joint association of SSB and MVPA with BMI among 119,467 children and adolescents in Jiangsu Province, China

| Groups                                   | Model 1 <sup>a</sup> |           | Model 2 <sup>b</sup> |           |
|------------------------------------------|----------------------|-----------|----------------------|-----------|
|                                          | $\beta$ (95% CI)     | P value   | $\beta$ (95% CI)     | P value   |
| (A) No SSB consumption + Adequate MVPA   | Ref                  |           | Ref                  |           |
| (B) No SSB consumption + Inadequate MVPA | 0.18(0.05,0.32)      | 0.008**   | 0.16(0.02,0.30)      | 0.020*    |
| (C) SSB consumption + Adequate MVPA      | 0.19(0.13,0.24)      | <0.001*** | 0.17(0.11,0.23)      | <0.001*** |
| (D) SSB consumption + Inadequate MVPA    | 0.62(0.53,0.71)      | <0.001*** | 0.59(0.50,0.68)      | <0.001*** |

<sup>a</sup> Model 1 adjusted for age and gender.

<sup>b</sup> Model 2 adjusted for age, gender, residence, regions, family types, paternal education, and maternal education.

\*p<0.05, \*\*p<0.01, \*\*\*p<0.001; Abbreviations: OR, odds ratio; CI, confidence interval.

## Supplementary Figure S2. Joint association of SSB and MVPA with BMI, stratified by age or gender

### (a) Subgroup analysis by age group

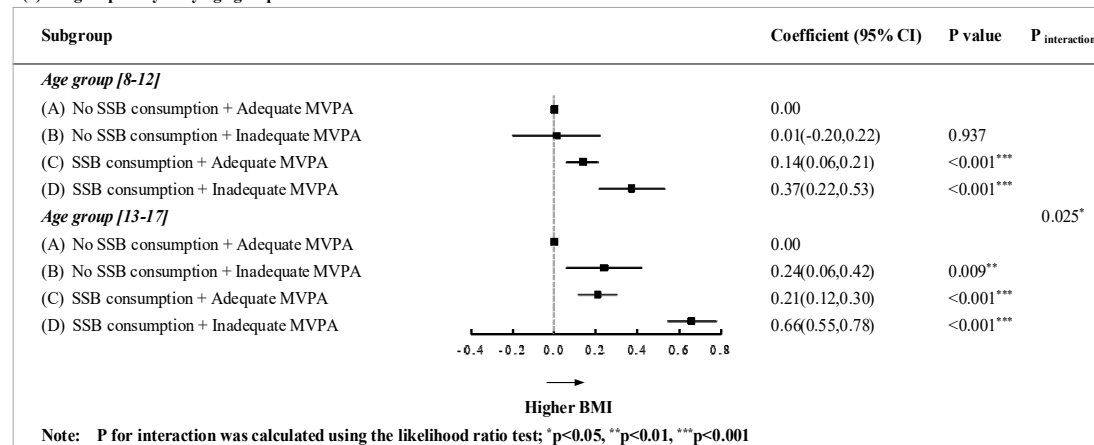

### (b) Subgroup analysis by gender

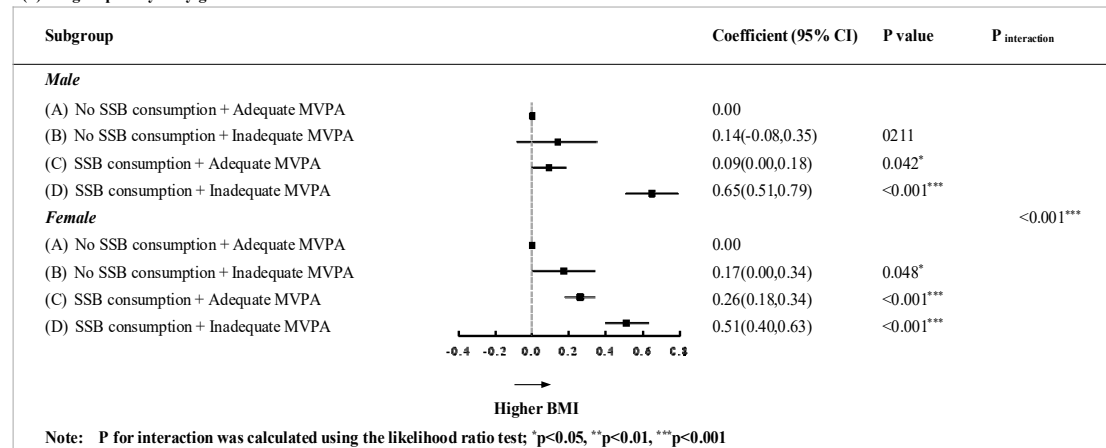

Supplement: s1 [file s1]
